# Supplementary material
Source: Springer Nature journal article supplement (https://www.springermedizin.de/resource/supplementary/13058_2005_1294_MOESM1_ESM.pdf/9698790)

**(a)**

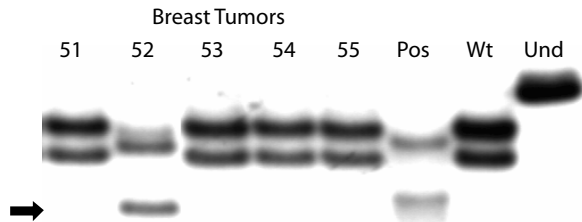

**(b)**

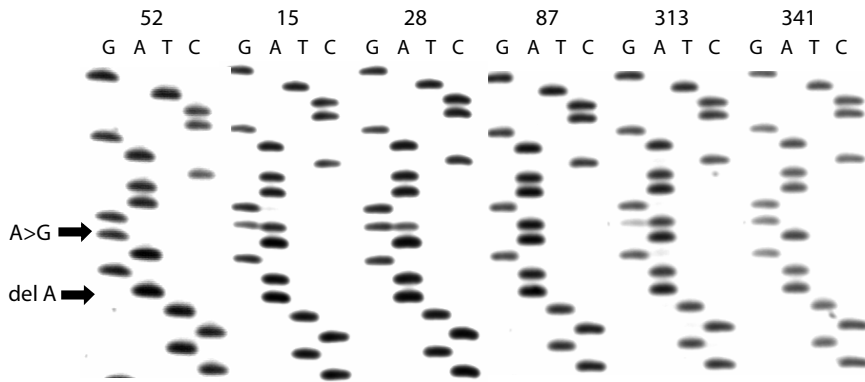

Supplement: MOESM1 [file 9698790]
